# Supplementary material for: Effects of a Lifestyle Intervention in Routine Care on Prenatal Dietary Behavior—Findings from the Cluster-Randomized GeliS Trial
Source: PubMed Central journal article supplement (PMC6678299; doi:10.3390/jcm8070960), 2019-07-02
Supplement: jcm-08-00960-s001.pdf [file jcm-08-00960-s001.pdf]

**Table S1.** Detailed version of the Healthy Eating Index in the intervention and control groups

|                             | Time point  | Intervention group |                      | Control group |                      | Adjusted effect size <sup>1</sup> (95% CI) | Adjusted p value <sup>1</sup> |
|-----------------------------|-------------|--------------------|----------------------|---------------|----------------------|--------------------------------------------|-------------------------------|
|                             |             | n                  | mean±SD              | n             | mean±SD              |                                            |                               |
| <b>Score beverages</b>      | T0          | 1025               | 95.52±12.48          | 979           | 94.29±14.86          |                                            |                               |
|                             | T1          | 949                | 95.53±12.34          | 928           | 95.34±12.53          | -0.28(-1.73,1.16)                          | 0.703                         |
|                             | Time effect |                    | p=0.834 <sup>2</sup> |               | p=0.053 <sup>2</sup> |                                            |                               |
| <b>Score vegetables</b>     | T0          | 1022               | 41.68±27.69          | 980           | 39.89±28.36          |                                            |                               |
|                             | T1          | 949                | 46.24±29.39          | 927           | 40.09±28.29          | 4.57(1.54,7.59)                            | 0.003                         |
|                             | Time effect |                    | p<0.001 <sup>2</sup> |               | p=0.615 <sup>2</sup> |                                            |                               |
| <b>Score fruit</b>          | T0          | 1022               | 75.02±30.63          | 980           | 70.48±32.07          |                                            |                               |
|                             | T1          | 948                | 75.42±29.94          | 928           | 71.57±31.20          | 2.14(1.02,3.26)                            | < 0.001                       |
|                             | Time effect |                    | p=0.484 <sup>2</sup> |               | p=0.381 <sup>2</sup> |                                            |                               |
| <b>Score cereal</b>         | T0          | 1025               | 55.62±27.60          | 979           | 53.29±26.98          |                                            |                               |
|                             | T1          | 949                | 54.07±24.83          | 929           | 52.92±26.35          | 0.02(-2.3,2.4)                             | 0.984                         |
|                             | Time effect |                    | p=0.100 <sup>2</sup> |               | p=0.789 <sup>2</sup> |                                            |                               |
| <b>Score side dishes</b>    | T0          | 1024               | 77.14±24.19          | 980           | 75.77±25.67          |                                            |                               |
|                             | T1          | 949                | 77.17±24.01          | 929           | 75.26±25.39          | 1.29(-1.05,3.61)                           | 0.280                         |
|                             | Time effect |                    | p=0.789 <sup>2</sup> |               | p=0.377 <sup>2</sup> |                                            |                               |
| <b>Score nuts</b>           | T0          | 1021               | 8.85±17.29           | 975           | 7.12±14.23           |                                            |                               |
|                             | T1          | 946                | 10.76±19.03          | 925           | 9.39±17.18           | 1.05(-0.45,2.54)                           | 0.169                         |
|                             | Time effect |                    | p=0.003 <sup>2</sup> |               | p<0.001 <sup>2</sup> |                                            |                               |
| <b>Score dairy products</b> | T0          | 1025               | 52.81±36.76          | 979           | 52.67±36.45          |                                            |                               |
|                             | T1          | 949                | 48.57±38.48          | 929           | 51.28±37.79          | -2.81(-6.66,1.05)                          | 0.153                         |
|                             | Time effect |                    | p=0.002 <sup>2</sup> |               | p=0.252 <sup>2</sup> |                                            |                               |
| <b>Score cheese</b>         | T0          | 1021               | 37.59±31.94          | 975           | 38.13±31.78          |                                            |                               |
|                             | T1          | 944                | 39.70±31.07          | 923           | 38.97±31.06          | 0.41(-1.39,2.22)                           | 0.653                         |
|                             | Time effect |                    | p=0.064 <sup>2</sup> |               | p=0.342 <sup>2</sup> |                                            |                               |
| <b>Score eggs</b>           | T0          | 1019               | 41.36±30.72          | 973           | 38.32±31.24          |                                            |                               |
|                             | T1          | 945                | 40.32±29.18          | 926           | 38.76±29.98          | -0.01(-3.5,3.4)                            | 0.995                         |
|                             | Time effect |                    | p=0.315 <sup>2</sup> |               | p=0.720 <sup>2</sup> |                                            |                               |
| <b>Score fish</b>           | T0          | 1025               | 48.40±34.88          | 979           | 45.10±34.74          |                                            |                               |
|                             | T1          | 947                | 55.34±34.58          | 926           | 46.68±33.55          | 7.60(5.28,9.93)                            | < 0.001                       |
|                             | Time effect |                    | p<0.001 <sup>2</sup> |               | p=0.179 <sup>2</sup> |                                            |                               |
| <b>Score meat</b>           | T0          | 1024               | 81.35±30.49          | 980           | 82.23±30.57          |                                            |                               |
|                             | T1          | 949                | 79.85±31.81          | 929           | 80.27±30.95          | 0.48(-2.66,3.61)                           | 0.767                         |
|                             | Time effect |                    | p=0.319 <sup>2</sup> |               | p=0.063 <sup>2</sup> |                                            |                               |
| <b>Score fats</b>           | T0          | 1016               | 99.84±3.47           | 977           | 99.76±3.10           |                                            |                               |
|                             | T1          | 946                | 99.72±4.84           | 922           | 99.80±3.05           | -0.15(-0.32,0.01)                          | 0.074                         |
|                             | Time effect |                    | p=0.538 <sup>2</sup> |               | p=0.777 <sup>2</sup> |                                            |                               |
| <b>Score sweets</b>         | T0          | 1025               | 11.86±20.73          | 980           | 13.11±22.30          |                                            |                               |
|                             | T1          | 949                | 9.58±19.52           | 929           | 8.83±19.38           | 0.65(-2.49,3.80)                           | 0.684                         |
|                             | Time effect |                    | p=0.002 <sup>2</sup> |               | p<0.001 <sup>2</sup> |                                            |                               |
| <b>Score alcohol</b>        | T0          | 1023               | 98.28±6.81           | 973           | 97.16±9.34           |                                            |                               |
|                             | T1          | 949                | 99.28±2.42           | 929           | 98.86±4.66           | 0.32(0.10,0.54)                            | 0.004                         |
|                             | Time effect |                    | p<0.001 <sup>2</sup> |               | p<0.001 <sup>2</sup> |                                            |                               |
| <b>Healthy Eating Index</b> | T0          | 1025               | 58.81±8.60           | 980           | 57.54±8.93           |                                            |                               |
|                             | T1          | 949                | 59.33±8.21           | 929           | 57.60±8.52           | 1.05(-0.42,2.53)                           | 0.162                         |
|                             | Time effect |                    | p<0.001 <sup>2</sup> |               | p<0.001 <sup>2</sup> |                                            |                               |

Abbreviations: T0: baseline assessment before the 12<sup>th</sup> week of gestation; T1: assessment after the 29<sup>th</sup> week of gestation.

<sup>1</sup>linear regression models fit using generalized estimating equations adjusted for pre-pregnancy BMI, age, parity and baseline score (T0);

<sup>2</sup>linear mixed models for repeated measures adjusted for pre-pregnancy BMI, age and parity.
